# B-lines Visualization and Lung Aeration Assessment

## Mind the Ultrasound Machine Setting

Silvia Mongodi, M.D., Ph.D., Andrea Stella, M.D., Anita Orlando, M.D., Ph.D., Francesco Mojoli, M.D.

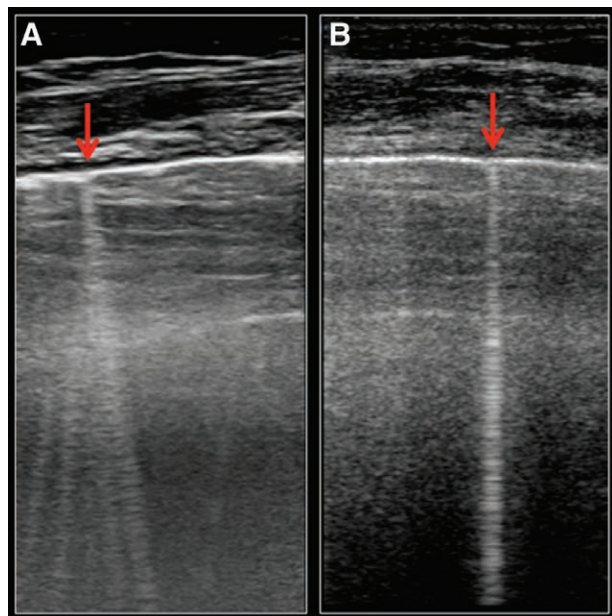

Artifacts are important signs in lung ultrasound and provide information on the underlying lung density.<sup>1</sup> A-lines are horizontal reverberation artifacts; B-lines are vertical hyperechoic laser-shaped artifacts. In the differential diagnosis of acute respiratory failure,<sup>2</sup> three or more B-lines per scan define a B-pattern and suggest cardiogenic edema while ruling out chronic pulmonary obstructive disease decompensation and pneumothorax.<sup>2</sup> Moreover, the number of B-lines progressively increases with lung density<sup>1</sup>: a B-lines reduction indicates good response to antibiotics in ventilator-associated pneumonia or to positive end-expiratory pressure trial in adult respiratory distress syndrome; an increase in B-lines after fluid resuscitation is an early sign of overload.<sup>3</sup> A correct visualization of B-lines and their number is therefore essential.

In Panel A, multiple B-lines are visualized in transversal scan; this B-pattern corresponds to moderate loss of aeration.<sup>1</sup> Also see Video 1 (Supplemental Digital Content 1, <http://links.lww.com/ALN/B816>). However, all the B-lines here derive from the same pleural point and are

oblique; this suggests that the machine setting is not adequate. In this modern ultrasound machine, artifact-erasing software and harmonics are active: these settings improve real-image visualization but can affect lung ultrasound by altering artifact visualization. In Panel B, the same scan is examined with no harmonics and no artifact-erasing software: a single straight B-line is visualized; this corresponds to normal aeration.<sup>1</sup> Also see Video 2 (Supplemental Digital Content 2, <http://links.lww.com/ALN/B817>).

Modern machines are perfectly suitable for lung ultrasound,<sup>1-3</sup> but a dedicated setting is useful and may be requested of manufacturers. We suggest setting a depth of 6 to 8 cm, placing a single focus on the pleural line, and abolishing artifact-erasing software and harmonics.

### Competing Interests

The authors declare no competing interests.

### Correspondence

Address correspondence to Dr. Mongodi: [silvia.mongodi@libero.it](mailto:silvia.mongodi@libero.it)

### References

1. Chiumello D, Mongodi S, Algieri I, Vergani GL, Orlando A, Via G, Crimella F, Cressoni M, Mojoli F: Assessment of lung aeration and recruitment by CT scan and ultrasound in ARDS patients. *Crit Care Med* 2018; 46:1761–8
2. Laursen CB, Sloth E, Lassen AT, Christensen Rd, Lambrechtsen J, Madsen PH, Henriksen DP, Davidsen JR, Rasmussen F: Point-of-care ultrasonography in patients admitted with respiratory symptoms: A single-blind, randomised controlled trial. *Lancet Respir Med* 2014; 2:638–46
3. Bouhemad B, Mongodi S, Via G, Rouquette I: Ultrasound for “lung monitoring” of ventilated patients. *ANESTHESIOLOGY* 2015; 122:437–47

Supplemental Digital Content is available for this article. Direct URL citations appear in the printed text and are available in both the HTML and PDF versions of this article. Links to the digital files are provided in the HTML text of this article on the Journal's Web site ([www.anesthesiology.org](http://www.anesthesiology.org)).

From the Department of Anesthesia and Intensive Care, Fondazione Istituto di Ricovero e Cura a Carattere Scientifico Policlinico S. Matteo, Pavia, Italy (S.M., A.O., F.M.); and the Department of Clinical-Surgical, Diagnostic and Pediatric Sciences, Unit of Anesthesia and Intensive Care, University of Pavia, Pavia, Italy (A.S., A.O., F.M.).

Copyright © 2019, the American Society of Anesthesiologists, Inc. Wolters Kluwer Health, Inc. All Rights Reserved. *Anesthesiology* 2019; 130:444
